# Supplementary material for: Causal association between inflammatory bowel disease and IgA nephropathy: A bidirectional two-sample Mendelian randomization study
Source: Front Genet. 2022 Nov 16;13:1002928. doi: 10.3389/fgene.2022.1002928 (PMC9710718; doi:10.3389/fgene.2022.1002928)
Supplement: Supplementary file 2 [file Table1.xlsx]

## Sheet: IBD and IgAN
Supplementary Table 1. Detailed information of SNPs used in IBD and IgAN MR analyses
Number	SNP	pval.exposure	pval.outcome	chromosome	beta	se	samplesize	EAF	effect_allele	other_allele	F	R2
1	rs6074022	8.32339e-11	0.721729	20	-0.0308864	0.0867232	5983	0.759427	T	C	42.1807	0.0253456
2	rs259964	6.92947e-12	0.957629	20	-0.0043926	0.082679	5983	0.524695	G	A	47.0471	0.0267674
3	rs2393902	1.46886e-10	0.2234	10	0.106274	0.0872859	5983	0.271865	C	T	41.0701	0.0250098
4	rs11230563	1.70608e-14	0.973358	11	0.0028408	0.085059	5983	0.339792	T	C	58.8447	0.0299347
5	rs7194886	2.53338e-36	0.761278	16	-0.0249272	0.0820504	5983	0.414988	T	C	158.398	0.0490942
6	rs7240004	1.01436e-10	0.649244	18	-0.0367287	0.0807558	5983	0.355048	G	A	41.7936	0.0252292
7	rs482759	3.48514e-08	0.804443	6	0.0247014	0.0997629	5983	0.226409	G	A	30.4168	0.021524
8	rs6651252	9.08239e-10	0.30432	8	0.117189	0.114084	5983	0.126099	C	T	37.5125	0.0239025
9	rs744166	1.14446e-22	0.757112	17	-0.0247346	0.0799758	5983	0.432923	G	A	96.0064	0.0382306
10	rs6662607	1.02939e-08	0.0833739	1	-0.14199	0.0820069	5983	0.38274	T	C	32.7847	0.022346
11	rs949969	4.52741e-09	0.692838	1	0.0391993	0.0992375	5983	0.197723	A	G	34.3827	0.0228839
12	rs4845604	1.20754e-17	0.489256	1	-0.0773661	0.111883	5983	0.135083	A	G	73.141	0.0333714
13	rs11121129	8.87892e-09	0.316345	1	-0.0887481	0.0885712	5983	0.312674	A	G	33.0726	0.0224438
14	rs4957279	5.87219e-11	0.29536	5	-0.142701	0.136368	5983	0.904807	C	T	42.863	0.0255497
15	rs314313	3.91679e-10	0.194039	7	0.113505	0.0873977	5983	0.271643	C	T	39.1537	0.0244197
16	rs17651741	2.80892e-08	0.870187	15	-0.016518	0.101076	5983	0.21453	A	G	30.8353	0.0216715
17	rs3853824	7.70123e-10	0.475553	17	-0.0597861	0.083796	5983	0.649119	C	T	37.8345	0.0240048
18	rs1292053	9.88781e-13	0.350887	17	-0.0727286	0.0779622	5983	0.402671	G	A	50.8662	0.0278322
19	rs2542145	6.02393e-10	0.0604937	18	-0.14847	0.0790919	5983	0.46087	A	C	38.3137	0.0241563
20	rs10758669	4.69894e-48	0.267895	9	-0.0953013	0.0860179	5983	0.659335	A	C	212.134	0.0568032
21	rs2847286	3.19728e-10	0.844136	18	0.0165729	0.0842948	5983	0.359559	G	A	39.5504	0.0245429
22	rs7279465	1.39136e-09	0.929607	21	-0.0081757	0.0925499	5983	0.21846	C	T	36.681	0.0236361
23	rs11713774	3.91922e-11	0.56299	3	0.0671638	0.116119	5983	0.157615	C	T	43.6536	0.0257843
24	rs6122172	9.50364e-09	0.768654	20	0.0237949	0.080898	5983	0.583043	T	C	32.9402	0.0223989
25	rs2284553	4.82447e-09	0.933699	21	0.0066101	0.0794565	5983	0.558106	G	A	34.259	0.0228427
26	rs2395182	1.4615e-29	0.0043482	6	0.347482	0.121849	5983	0.841028	T	G	127.476	0.0440475
27	rs913678	5.34687e-11	0.308634	20	-0.0851741	0.0836605	5983	0.33868	C	T	43.0462	0.0256043
28	rs941823	6.18728e-13	0.617246	13	-0.0445155	0.089074	5983	0.745454	C	T	51.7867	0.0280828
29	rs6058869	2.63494e-08	0.0921892	20	-0.136679	0.0811653	5983	0.409871	T	C	30.9591	0.0217151
30	rs11739623	1.43592e-09	0.0875044	5	0.152354	0.0891631	5983	0.243135	T	C	36.6194	0.0236163
31	rs1182188	1.07912e-09	0.0709398	7	-0.165139	0.0914462	5983	0.298347	C	T	37.1765	0.0237952
32	rs2538470	2.99916e-11	0.182344	7	-0.104102	0.0780627	5983	0.598277	G	A	44.1771	0.0259385
33	rs224136	3.16155e-15	0.00428953	10	-0.356296	0.124751	5983	0.122105	T	C	62.164	0.0307667
34	rs2688608	2.75467e-10	0.924284	10	0.0078625	0.0827297	5983	0.552601	T	G	39.8412	0.024633
35	rs151719	1.25785e-08	0.117669	6	-0.14396	0.0920086	5983	0.765943	T	C	32.3955	0.0222129
36	rs10800309	6.1546e-37	0.00851824	1	-0.226232	0.0859932	5983	0.686046	G	A	161.211	0.0495276
37	rs1517352	3.86545e-14	0.348582	2	-0.0777572	0.0829549	5983	0.624024	C	A	57.2358	0.0295228
38	rs4555967	1.29119e-08	0.161313	6	-0.110497	0.0788888	5983	0.4551	A	G	32.3449	0.0221955
39	rs559928	3.32583e-13	0.689908	11	0.0390523	0.0978804	5983	0.811566	C	T	53.0056	0.0284113
40	rs4692386	1.21194e-08	0.1548	4	0.115693	0.0813151	5983	0.601791	C	T	32.4676	0.0222377
41	rs3873444	1.21222e-08	0.313269	6	0.134726	0.133606	5983	0.092824	T	C	32.4673	0.0222375
42	rs915286	2.88636e-09	0.866256	13	-0.0138474	0.0822218	5983	0.528056	A	G	35.2591	0.0231736
43	rs1990623	1.05999e-15	0.342262	16	0.101781	0.107172	5983	0.14534	G	A	64.315	0.0312946
44	rs3895736	8.77405e-13	0.126461	3	-0.179967	0.117764	5983	0.181805	A	C	51.101	0.0278963
45	rs7236492	1.45452e-08	0.94585	18	0.0070727	0.104133	5983	0.176153	T	C	32.1131	0.0221159
46	rs1990760	3.56246e-10	0.196103	2	-0.103585	0.080129	5983	0.597577	T	C	39.3391	0.0244773
47	rs2024092	1.1246e-18	0.197382	19	0.118693	0.0920779	5983	0.205831	A	G	77.8273	0.0344234
48	rs1528602	2.19174e-08	0.99154	16	0.0010246	0.0966306	5983	0.287662	C	T	31.3168	0.0218401
49	rs12599586	3.57355e-08	0.948391	16	0.0057449	0.0887554	5983	0.73604	A	G	30.3682	0.0215068
50	rs12720356	4.12952e-16	0.884285	19	0.0191251	0.131409	5983	0.109339	C	A	66.1732	0.0317431
51	rs7015630	2.89694e-08	0.677526	8	0.0384116	0.0923705	5983	0.275321	C	T	30.7753	0.0216505
52	rs1535	2.78439e-09	0.236816	11	0.0986859	0.0834212	5983	0.332454	G	A	35.3289	0.0231967
53	rs3806308	1.08368e-21	0.249007	1	-0.0921951	0.0799774	5983	0.399559	T	C	91.5588	0.0373348
54	rs11587213	2.32997e-08	0.0648799	1	-0.199755	0.108205	5983	0.178286	G	A	31.1979	0.0217987
55	rs780094	3.88329e-15	0.385265	2	-0.0700806	0.0807162	5983	0.637437	C	T	61.7582	0.0306664
56	rs974801	7.07457e-13	0.809773	4	-0.0208236	0.0865055	5983	0.348504	G	A	51.5234	0.0280114

## Sheet: UC and IgAN
Supplementary Table 2. Detailed information of SNPs used in UC and IgAN MR analyses
Number	SNP	pval.exposure	pval.outcome	chromosome	beta	se	samplesize	EAF	effect_allele	other_allele	F	R2
1	rs2857107	4.9705e-16	0.978438	1	0.0021573	0.0798211	5983	0.552942	A	G	65.8075	0.048952
2	rs241436	2.73401e-16	0.438234	1	-0.0768599	0.0991512	5983	0.209573	C	T	66.9863	0.0493877
3	rs11230563	1.90296e-08	0.107096	6	-0.13061	0.0810546	5983	0.429403	T	C	31.5912	0.0339272
4	rs7279465	2.32756e-12	0.196103	2	-0.103585	0.080129	5983	0.597577	T	C	49.1865	0.0423271
5	rs13430791	1.39422e-08	0.751216	17	-0.0261369	0.0824413	5983	0.353822	C	A	32.195	0.03425
6	rs913678	1.22914e-08	0.884285	19	0.0191251	0.131409	5983	0.109339	C	A	32.4405	0.0343799
7	rs9891119	1.72346e-11	0.249007	1	-0.0921951	0.0799774	5983	0.399559	T	C	45.2623	0.040605
8	rs6426833	3.77051e-76	0.313269	6	0.134726	0.133606	5983	0.092824	T	C	341.047	0.111161
9	rs10758669	1.03753e-28	0.649244	18	-0.0367287	0.0807558	5983	0.355048	G	A	123.588	0.0670483
10	rs887464	2.89668e-08	9.5801e-05	6	-0.360783	0.0924825	5983	0.301903	A	G	30.7754	0.0334867
11	rs3892710	3.185e-09	0.785181	4	-0.0229611	0.0842382	5983	0.383846	C	T	35.0673	0.035744
12	rs941823	1.39155e-13	0.0898918	7	0.132465	0.0781056	5983	0.53076	A	G	54.7183	0.0446414
13	rs10492999	9.41781e-09	0.174091	6	-0.108654	0.0799413	5983	0.489742	G	A	32.9579	0.0346529
14	rs10494343	1.67985e-08	0.973358	11	0.0028408	0.085059	5983	0.339792	T	C	31.8335	0.034057
15	rs7240004	2.49862e-10	0.126461	3	-0.179967	0.117764	5983	0.181805	A	C	40.0321	0.0381887
16	rs1801274	1.4345e-41	0.114159	6	0.181386	0.114818	5983	0.133347	T	C	182.422	0.0814156
17	rs10182181	4.61339e-08	0.073821	6	-0.247475	0.13843	5983	0.09725	T	C	29.8726	0.0329922
18	rs949969	8.81252e-12	0.646547	7	-0.0362517	0.0790548	5983	0.417311	A	G	46.5761	0.0411897
19	rs1182188	5.03153e-15	0.692838	1	0.0391993	0.0992375	5983	0.197723	A	G	61.2486	0.0472275
20	rs3774937	4.60787e-14	0.203871	2	0.0994535	0.0782728	5983	0.500486	G	A	56.8903	0.0455182
21	rs151719	4.17927e-14	0.267895	9	-0.0953013	0.0860179	5983	0.659335	A	C	57.0826	0.0455949
22	rs1517352	2.09991e-09	0.929607	21	-0.0081757	0.0925499	5983	0.21846	C	T	35.8786	0.0361549
23	rs4845604	1.19536e-18	0.00232161	6	-0.251097	0.082444	5983	0.636171	T	C	77.7072	0.0531879
24	rs2070729	4.58775e-11	0.310867	1	-0.176078	0.173749	5983	0.0603476	G	A	43.3456	0.0397367
25	rs3095150	7.42848e-12	0.00619584	1	-0.229383	0.0838011	5983	0.512143	G	A	46.9109	0.0413374
26	rs3873444	4.04622e-08	0.0709398	7	-0.165139	0.0914462	5983	0.298347	C	T	30.1269	0.0331323
27	rs3895736	3.38618e-09	0.117669	6	-0.14396	0.0920086	5983	0.765943	T	C	34.9482	0.0356832
28	rs1990760	1.7809e-10	0.308634	20	-0.0851741	0.0836605	5983	0.33868	C	T	40.6936	0.0385028
29	rs4728142	1.91823e-14	0.488135	20	-0.0565362	0.081549	5983	0.51559	A	G	58.6144	0.046202
30	rs12720356	1.67225e-11	0.489256	1	-0.0773661	0.111883	5983	0.135083	A	G	45.3215	0.0406315
31	rs1077773	5.96458e-09	0.917027	2	0.0122311	0.117404	5983	0.128255	A	G	33.846	0.0351166
32	rs4812833	1.87068e-16	0.177072	5	-0.108817	0.0806159	5983	0.440441	A	C	67.7343	0.0496624
33	rs3806308	5.55904e-39	0.617246	13	-0.0445155	0.089074	5983	0.745454	C	T	170.569	0.0787346

## Sheet: CD and IgAN
Supplementary Table 3. Detailed information of SNPs used in CD and IgAN MR analyses
Number	SNP	pval.exposure	pval.outcome	chromosome	beta	se	samplesize	EAF	effect_allele	other_allele	F	R2
1	rs6074022	2.6965e-12	0.342262	16	0.101781	0.107172	5983	0.14534	G	A	48.898	0.0483638
2	rs2413583	7.72147e-36	0.643018	1	0.037589	0.081101	5983	0.452503	T	G	156.184	0.0863246
3	rs259964	2.08238e-09	0.00851824	1	-0.226232	0.0859932	5983	0.686046	G	A	35.8951	0.0414439
4	rs2071556	1.83278e-09	0.350887	17	-0.0727286	0.0779622	5983	0.402671	G	A	36.144	0.0415871
5	rs11230563	4.23058e-11	0.973358	11	0.0028408	0.085059	5983	0.339792	T	C	43.504	0.0456214
6	rs7194886	1.4184e-77	0.948391	16	0.0057449	0.0887554	5983	0.73604	A	G	347.59	0.128487
7	rs3197999	2.05211e-33	0.595467	10	0.0491078	0.0924939	5983	0.71023	T	G	145.09	0.0832137
8	rs2836878	4.60893e-15	0.357104	5	-0.0743515	0.0807381	5983	0.468376	T	C	61.4209	0.0541961
9	rs6651252	3.86011e-16	0.94585	18	0.0070727	0.104133	5983	0.176153	T	C	66.3069	0.056307
10	rs210837	1.62772e-08	0.00834027	6	0.253494	0.0960942	5983	0.200906	G	T	31.8947	0.0390681
11	rs6693292	4.41469e-09	0.197382	19	0.118693	0.0920779	5983	0.205831	A	G	34.4317	0.040591
12	rs1267501	9.69059e-09	0.864823	21	0.0153369	0.090091	5983	0.268176	A	G	32.9022	0.03968
13	rs314313	2.89554e-08	0.77338	6	0.0258653	0.0898236	5983	0.256576	G	A	30.7765	0.0383776
14	rs2302759	2.3752e-12	0.038104	1	0.221893	0.107001	5983	0.156557	A	G	49.1472	0.0484865
15	rs3853824	1.17319e-10	0.939548	6	0.0070165	0.0925206	5983	0.757901	C	T	41.5093	0.0445642
16	rs1292053	1.74703e-14	0.406461	17	0.121151	0.14594	5983	0.888719	G	A	58.798	0.0530281
17	rs2542145	1.56711e-10	0.036626	1	-0.267498	0.127995	5983	0.906063	G	A	40.9434	0.0442597
18	rs2524044	2.1424e-09	0.182344	7	-0.104102	0.0780627	5983	0.598277	G	A	35.8398	0.0414119
19	rs3134931	1.04496e-11	0.689908	11	0.0390523	0.0978804	5983	0.811566	C	T	46.2419	0.0470337
20	rs10758669	4.18504e-34	0.843137	22	0.0205246	0.103721	5983	0.149077	T	C	148.25	0.0841114
21	rs11713774	1.08868e-14	0.761278	16	-0.0249272	0.0820504	5983	0.414988	T	C	59.729	0.0534455
22	rs7195296	2.56212e-11	0.28219	4	0.092697	0.0861967	5983	0.640698	G	A	44.486	0.0461327
23	rs2284553	5.626e-17	0.933699	21	0.0066101	0.0794565	5983	0.558106	G	A	70.1034	0.0578944
24	rs3024505	3.94548e-25	0.161313	6	-0.110497	0.0788888	5983	0.4551	A	G	107.239	0.071573
25	rs10798069	4.24717e-09	0.957629	20	-0.0043926	0.082679	5983	0.524695	G	A	34.5074	0.0406353
26	rs1990684	2.47229e-09	0.160417	16	0.143074	0.101929	5983	0.81235	G	A	35.5608	0.0412505
27	rs212388	1.79515e-16	0.217296	6	0.112128	0.0908835	5983	0.314764	C	T	67.8156	0.0569432
28	rs2538470	1.04597e-09	0.00428953	10	-0.356296	0.124751	5983	0.122105	T	C	37.2374	0.0422109
29	rs224136	9.15166e-15	0.0340024	16	-0.200466	0.0945572	5983	0.284325	C	A	60.071	0.0535979
30	rs2476601	3.83089e-17	0.0860102	16	-0.232478	0.135411	5983	0.082494	T	C	70.8624	0.0582061
31	rs10800309	8.47813e-13	0.257475	6	-0.0892378	0.0788056	5983	0.598173	T	G	51.1683	0.0494725
32	rs1517352	1.31362e-10	0.571926	1	-0.0483571	0.085555	5983	0.300077	C	A	41.2884	0.0444455
33	rs2188958	5.64287e-11	0.267895	9	-0.0953013	0.0860179	5983	0.659335	A	C	42.9409	0.0453252
34	rs4555967	1.0792e-09	0.00361327	6	-0.383395	0.131747	5983	0.117996	C	T	37.1761	0.0421764
35	rs559928	3.74524e-10	0.866256	13	-0.0138474	0.0822218	5983	0.528056	A	G	39.2411	0.0433309
36	rs7758080	7.27327e-09	0.677526	8	0.0384116	0.0923705	5983	0.275321	C	T	33.4601	0.0400148
37	rs2227551	4.72389e-13	0.56299	3	0.0671638	0.116119	5983	0.157615	C	T	52.3161	0.0500238
38	rs2107202	6.10225e-10	0.0604937	18	-0.14847	0.0790919	5983	0.46087	A	C	38.2887	0.042802
39	rs7775228	8.20163e-18	0.248502	11	0.0955463	0.0827961	5983	0.337296	C	T	73.9042	0.05944
40	rs915286	2.5875e-08	0.385265	2	-0.0700806	0.0807162	5983	0.637437	C	T	30.9943	0.0385133
41	rs1990623	4.51648e-38	0.194039	7	0.113505	0.0873977	5983	0.271643	C	T	166.403	0.0890934
42	rs6500336	1.6878e-10	0.419254	16	0.106243	0.131535	5983	0.11289	G	T	40.798	0.0441813
43	rs7236492	9.09452e-09	0.010283	6	0.208223	0.0811416	5983	0.608658	T	C	33.0258	0.0397543
44	rs2024092	7.12525e-25	0.475553	17	-0.0597861	0.083796	5983	0.649119	C	T	106.068	0.071182
45	rs6908425	4.80839e-12	0.244206	6	0.108199	0.092911	5983	0.761928	C	T	47.7641	0.0478002
46	rs1528602	1.7183e-17	0.0598081	6	0.202963	0.107833	5983	0.824103	C	T	72.4441	0.0588511
47	rs12599586	1.11918e-13	0.11583	3	0.13723	0.0872674	5983	0.262202	A	G	55.1459	0.0513569
48	rs7438704	3.41979e-11	0.884285	19	0.0191251	0.131409	5983	0.109339	C	A	43.9207	0.045839
49	rs2523554	1.57616e-14	0.886379	6	0.0110302	0.0771948	5983	0.5582	T	C	59.0005	0.0531192
50	rs12720356	3.38532e-11	0.30432	8	0.117189	0.114084	5983	0.126099	C	T	43.94	0.0458493
51	rs7015630	8.99974e-10	0.99154	16	0.0010246	0.0966306	5983	0.287662	C	T	37.5307	0.0423766
52	rs102275	3.97741e-13	0.721729	20	-0.0308864	0.0867232	5983	0.759427	T	C	52.6546	0.0501849
53	rs2641348	9.65162e-10	0.348582	2	-0.0777572	0.0829549	5983	0.624024	C	A	37.3938	0.0422996
54	rs780094	4.55722e-22	0.748633	1	0.0426468	0.133088	5983	0.108937	G	A	93.272	0.0667607
55	rs974801	1.26853e-08	0.809773	4	-0.0208236	0.0865055	5983	0.348504	G	A	32.3788	0.0393634
